# Supplementary material
Source: PubMed Central journal article supplement (PMC8640387)
Supplement: flgastro-2020-101412supp001.pdf [file flgastro-2020-101412supp001.pdf]

## Supplementary file

### Disease Severity Questionnaire

| <b>Year</b><br><b>Disease Activity</b> | <b>This year</b> | <b>One year ago</b> | <b>Two years ago</b> |
|----------------------------------------|------------------|---------------------|----------------------|
| No Symptoms-0                          |                  |                     |                      |
| Mild Symptoms-1                        |                  |                     |                      |
| Medium Symptoms-2                      |                  |                     |                      |
| Active Disease- 3                      |                  |                     |                      |
| Hospitalisation- 4                     |                  |                     |                      |
| Surgery- 5                             |                  |                     |                      |
| Stoma- 5                               |                  |                     |                      |
| <b>a. Highest score</b>                |                  |                     |                      |
| <b>Treatment:</b>                      |                  |                     |                      |
| No Treatment-0                         |                  |                     |                      |
| 5-ASA or Antibiotics-1                 |                  |                     |                      |
| Low dose steroids-2                    |                  |                     |                      |
| Steroids-3                             |                  |                     |                      |
| Immunosuppressive-4                    |                  |                     |                      |
| Biologics-5                            |                  |                     |                      |
| <b>b. Sum of treatments</b>            |                  |                     |                      |
| <b>Total year score (a+b)</b>          |                  |                     |                      |

\*Disease severity= average of total score of each year
